# Supplementary material
Source: PubMed Central journal article supplement (PMC4396604)
Supplement: supp_fj.14-259598_Supplemental_Figures.pdf [file supp_fj.14-259598_Supplemental_Figures.pdf]

### **Supplemental Fig. 1. Experimental timeline and tissue preparation**

(A) All mice used in this study were handled according to the depicted timeline, with the exception of the HM mice that were colonized with microbiota from a second human donor at 8 weeks and sacrificed at 12 weeks of age (Supplemental Fig. 2). (B) Regions of the mouse colon used in different applications are indicated.

### **Supplemental Fig. 2. Sex and colonization dependent differences in relative expression of *Tph1* and *Chga* in proximal colon**

Microbial colonization was associated with significant differences in *Tph1* and *Chga* expression ( $P < .0001$ ), with lowest expression of both genes observed in GF mice; differential expression of these genes was not observed on the basis of sex.

### **Supplemental Fig. 3. Expression of serotonergic genes in the proximal colon of GF and HM mice using a second human donor**

qRT-PCR was used to assess relative expression of selected serotonergic mRNAs in proximal colonic segments from 12-week-old, male GF and HM mice (4-5 mice/group; fecal donor was a healthy 37-year-old man). Relative mRNA expression was normalized to the housekeeping gene *Rpl32*, which encodes ribosomal protein L32. (A) *Tph1* mRNA encodes tryptophan hydroxylase 1, the rate-limiting enzyme for mucosal 5-HT production. (B) *Chga* mRNA encodes chromogranin A, involved in secretion of 5-HT from EC cells. (C) *Maoa* mRNA encodes monoamine oxidase A, the main enzyme for 5-HT catabolism in the gut. (D) *Slc6a4* mRNA encodes the mouse homolog of SERT (serotonin transporter). Student *t* test; \* indicates  $P < .05$ ; n.s.,  $P > .05$ .

### **Supplemental Fig. 4. Sex and colonization dependent differences in relative expression of *Maoa*, *Slc6a4*, and *Htr4* mRNA in the proximal colon**

(A) *Maoa* mRNA encodes monoamine oxidase A, the main enzyme for 5-HT catabolism in the gut (14-16 mice/group; 1-way ANOVA). (B) Sex and colonization state based differences in *Maoa* expression (7-10 males/group vs 6-7 females/group; 2-way ANOVA; \*,  $P < .05$ ). (C) *Slc6a4* mRNA encodes the mouse homolog of SERT, serotonin transporter (14-16 mice/group; 1-way ANOVA). (D) Sex and colonization state-dependent differences in *Slc6a4* mRNA expression in CR mice (7-10 males/group vs 6-7 females/group; 2-way ANOVA; \*,  $P < .05$ ). (E) *Htr4* mRNA encodes serotonin receptor 5-HT<sub>4</sub> (14-16 mice/group; 1-way ANOVA). (F) Sex and colonization state-dependent differences in *Htr4* expression (7-10 males/group vs 6-7 females/group; 2-way ANOVA; \*,  $P < .05$ ).

### **Supplemental Fig. 5. Proximal colonic 5-HT concentrations in male and female mice**

Tissue 5-HT concentrations from emptied segments of proximal colon in males and females from GF, HM, and CR groups (8 mice/group [4 males]; Student *t* test).

### **Supplemental Fig. 6. Proximal colonic enterochromaffin cell density is not significantly different in GF, HM, and CR mice**

Enterochromaffin cells were identified by immunohistochemical detection of 5-HT in the colonic mucosa (red, Cy3-labeled 5-HT<sup>+</sup> cells; blue, nuclei counterstained with DAPI). Similar densities were observed in proximal colon sections from GF, HM, and CR mice (6-7 mice/group; 7 cryosections and 21 high-power fields/mouse [ie, 3 HPFs/section]; 1-way ANOVA). Scale bars = 100  $\mu$ M. 5-HT indicates 5-hydroxytryptamine; ANOVA, analysis of variance; CR, conventionally raised; DAPI, 4',6-diamidino-2-phenylindole; GF, germ free; HM, humanized.

### **Supplemental Fig. 7. Intestinal lengths and cecal sizes of GF, HM, and CR mice**

(A) Small-intestinal length, (B) colonic length sans cecum, and (C) cecal weight of GF, HM, and CR mice 14-21 mice/group; 1-way ANOVA; \*\*\*,  $P < .001$ ; \*\*\*\*,  $P < .0001$ .
