# Supplementary material
Source: PubMed Central journal article supplement (PMC4396604)
Supplement: supp_fj.14-259598_Supplemental_Table1.pdf [file supp_fj.14-259598_Supplemental_Table1.pdf]

**Supplemental Table 1. PCR primers used in this study**

| <b>Target</b>      | <b>NCBI Accession</b> | <b>Species</b>           | <b>Forward Sequence (5'-3')</b> | <b>Reverse Sequence (5'-3')</b> | <b>Application</b>    |
|--------------------|-----------------------|--------------------------|---------------------------------|---------------------------------|-----------------------|
| 16S rRNA gene      | n/a                   | pan-Bacterial            | AGAGTTTGATCCTGGCTCAG            | GACGGGCGGTGGWTRCA               | Germ-free screening   |
| 16S rRNA gene      | AB727349.1            | <i>Turicibacter spp.</i> | GCGCGCAGGTGGTTAATTAAGTCT        | TCAGTGTCAGTTGCAGACCAGGAA        | Germ-free screening   |
| 16S rRNA gene      | NR_102911.1           | <i>Helicobacter spp.</i> | GCATTTGAACTGTTACTCTG            | CTGTTTTCAAGCTCCCC               | Germ-free screening   |
| <i>L32 cDNA</i>    | NM_172086.2           | <i>Mus musculus</i>      | CCTCTGGTGAAGCCCAAGATC           | TCTGGGTTTCCGCCAGTTT             | qRT-PCR (mouse colon) |
| <i>Tph1 cDNA</i>   | NM_009414.2           | <i>Mus musculus</i>      | AAGAAATTGGCCTGGCTTC             | GTTTGCACAGCCCAAATC              | qRT-PCR (mouse colon) |
| <i>Chga cDNA</i>   | NM_007693.1           | <i>Mus musculus</i>      | CCCACTGCAGCATCCAGTT             | AGTCCGACTGACCATCATCTTTC         | qRT-PCR (mouse colon) |
| <i>Maoa cDNA</i>   | NM_173740.3           | <i>Mus musculus</i>      | GGAGAAGCCCAGTATCACAGG           | GAACCAAGACATTAATTTTGTATTCTGAC   | qRT-PCR (mouse colon) |
| <i>Slc6a4 cDNA</i> | NM_010484.2           | <i>Mus musculus</i>      | TATCCAATGGGTACTCCGCAG           | CCGTTCCCCTTGGTGAATCT            | qRT-PCR (mouse colon) |
| <i>Htr4 cDNA</i>   | NM_008313.4           | <i>Mus musculus</i>      | AGTTCCAACGAGGGTTTCAGG           | CAGCAGGTTGCCCAAGATG             | qRT-PCR (mouse colon) |
| <i>ACTB cDNA</i>   | NM_001101.3           | <i>Homo sapiens</i>      | ACTCTTCCAGCCTTCTTCTCT           | CAGTGATCTCCTTCTGCATCCT          | qRT-PCR (BON cells)   |
| <i>TPH1 cDNA</i>   | NM_004179.2           | <i>Homo sapiens</i>      | TGCAAAGGAGAAGATGAGAGAATTTAC     | CTGGTTATGCTCTTGGTGTCTTTC        | qRT-PCR (BON cells)   |
