# Supplementary material
Source: PubMed Central journal article supplement (PMC4396604)

Supplemental Fig. 1

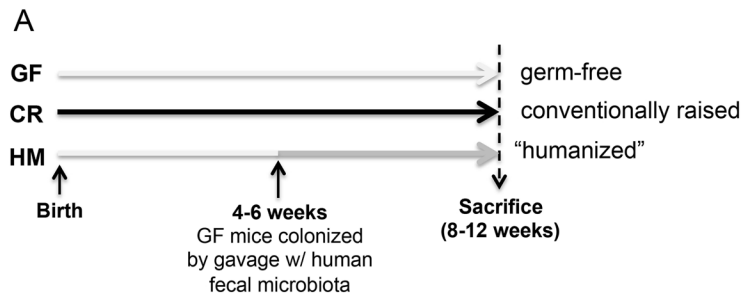

**B**  
 Regions of colon used in this study:

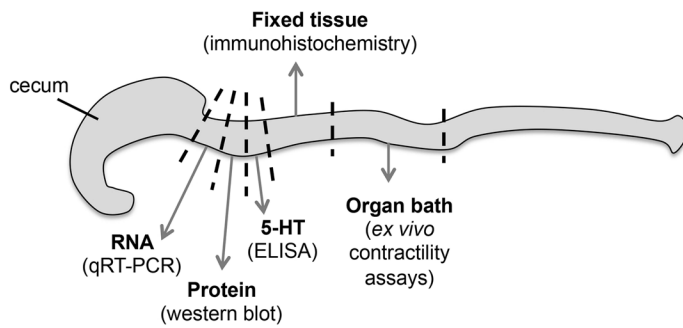

Supplemental Fig. 2

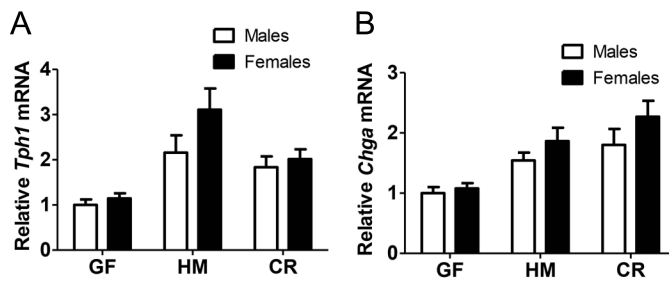

Supplemental Fig. 3

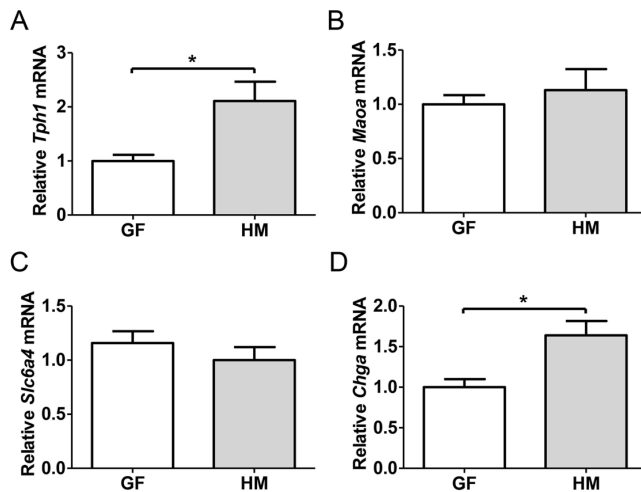

Supplement: supp_fj.14-259598_Supplemental_Figure1.pdf [file supp_fj.14-259598_Supplemental_Figure1.pdf]

Supplemental Fig. 4

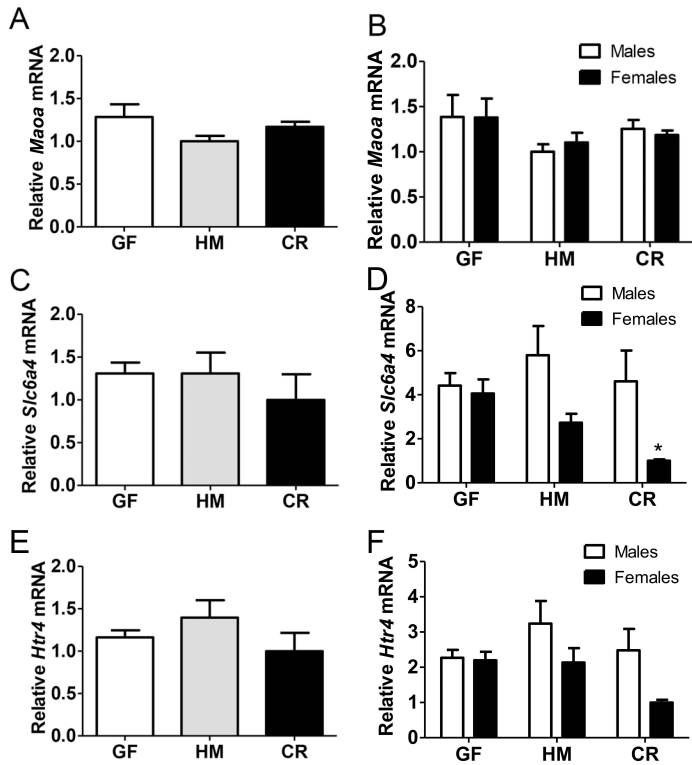

Supplemental Fig. 5

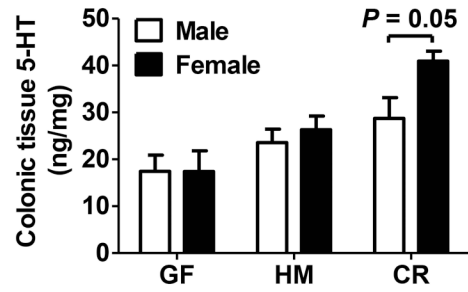

Supplemental Fig. 6

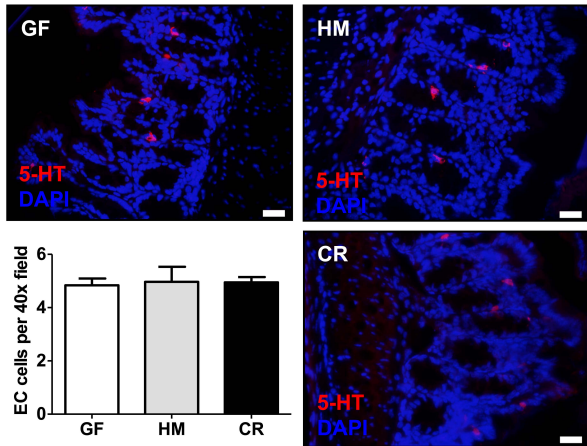

Supplemental Fig. 7

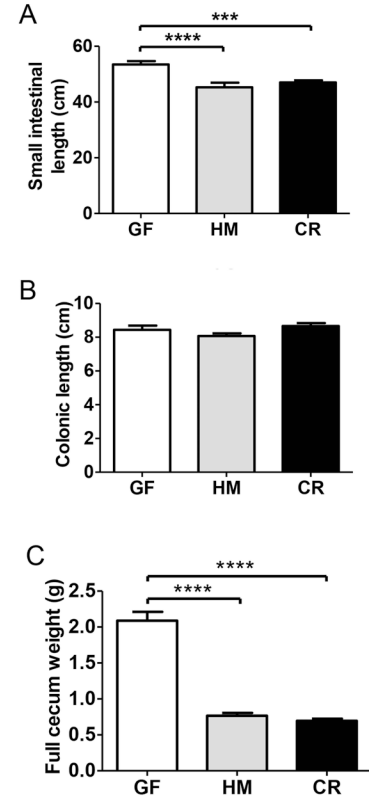

Supplement: supp_fj.14-259598_Supplemental_Figure2.pdf [file supp_fj.14-259598_Supplemental_Figure2.pdf]
